# Supplementary material for: Human mesenchymal stem cells labelled with dye-loaded amorphous silica nanoparticles: long-term biosafety, stemness preservation and traceability in the beating heart
Source: PubMed Central journal article supplement (PMC4625930; doi:10.1186/s12951-015-0141-1), 2015-10-29

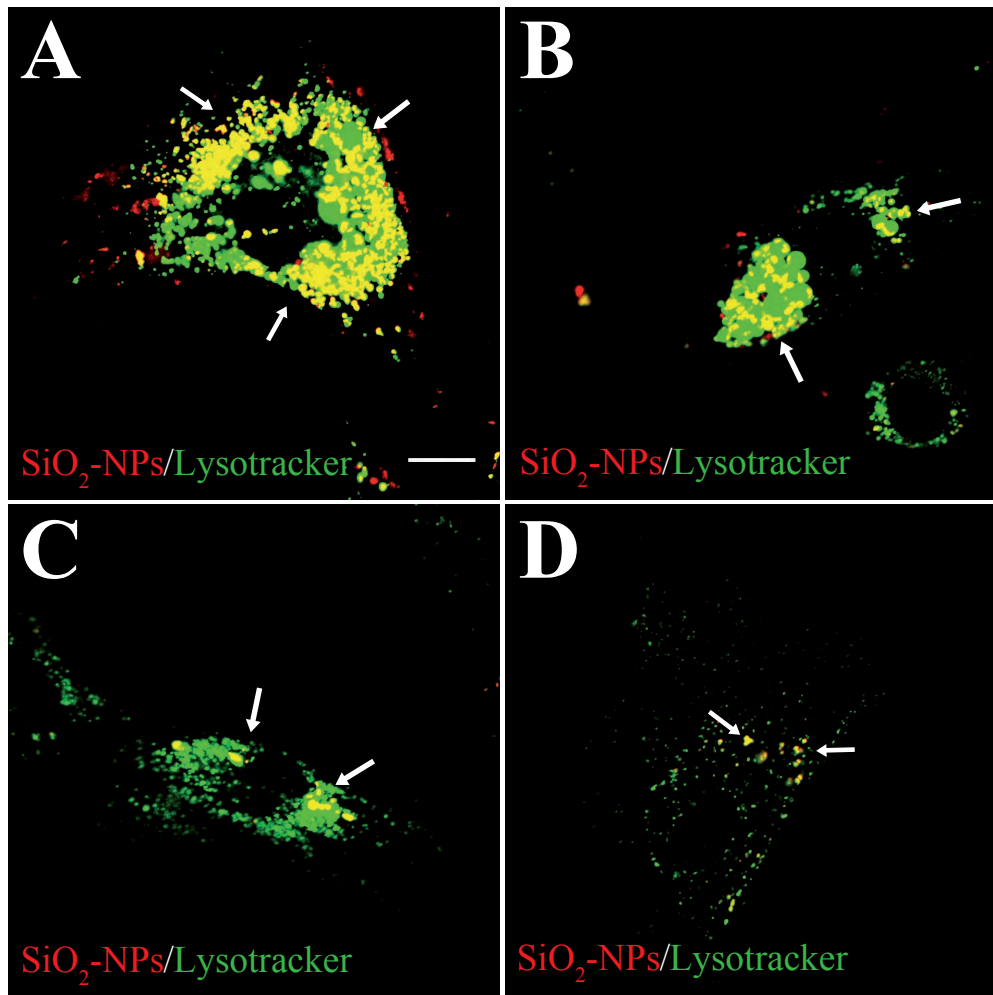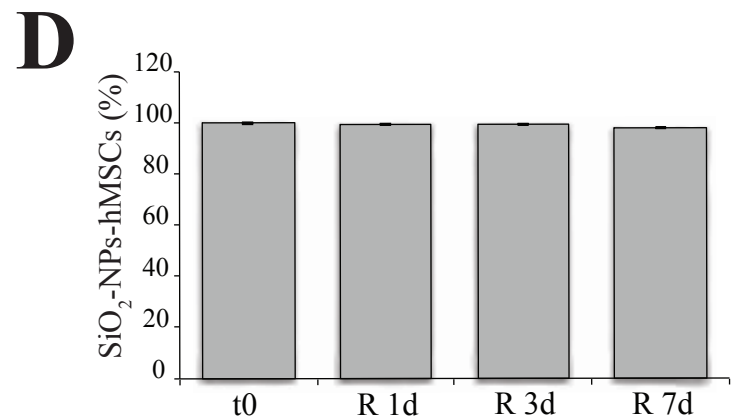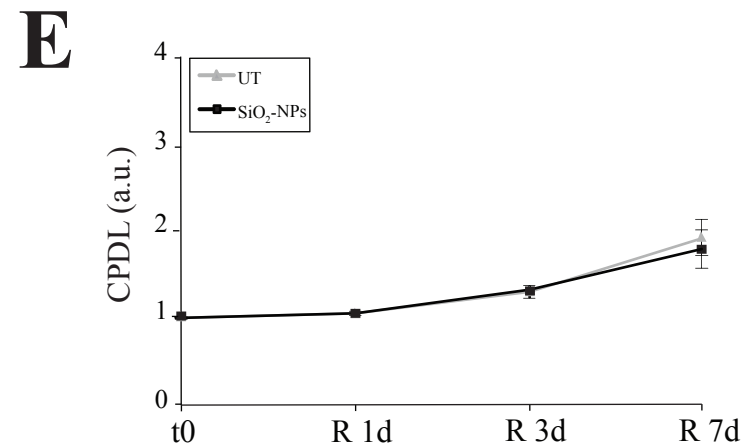

Supplement: 12951_2015_141_MOESM2_ESM.pdf [file 12951_2015_141_MOESM2_ESM.pdf]
